# Supplementary material for: Cupriavidus sp. HN-2, a Novel Quorum Quenching Bacterial Isolate, is a Potent Biocontrol Agent Against Xanthomonas campestris pv. campestris
Source: PubMed Central journal article supplement (PMC7022395; doi:10.3390/microorganisms8010045), 2019-12-25
Supplement: microorganisms-08-00045-s001.pdf [file microorganisms-08-00045-s001.pdf]

## Supplementary Materials

### ***Cupriavidus* sp. HN-2, a Novel Quorum Quenching Bacterial Isolate, is a Potent Biocontrol Agent Against *Xanthomonas campestris* pv. *campestris***

Tian Ye <sup>1,2,†</sup>, Tian Zhou <sup>1,2,†</sup>, Qiting Li <sup>1,2,†</sup>, Xudan Xu <sup>1,2</sup>, Xinghui Fan <sup>1,2</sup>, Lianhui Zhang <sup>1,2</sup> and Shaohua Chen <sup>1,2,\*</sup>

<sup>1</sup> State Key Laboratory for Conservation and Utilization of Subtropical Agro-bioresources, Guangdong Laboratory of Lingnan Modern Agriculture, Integrative Microbiology Research Centre, South China Agricultural University, Guangzhou 510642, China; 20182047012@stu.scau.edu.cn (T.Y.); 20171021009@stu.scau.edu.cn (T.Z.); 201614090409@stu.scau.edu.cn (Q.L.); xuxudan@stu.scau.edu.cn (X.X.); fxhscau@163.com (X.F.); lhzhang01@scau.edu.cn (L.Z.)

<sup>2</sup> Guangdong Province Key Laboratory of Microbial Signals and Disease Control, South China Agricultural University, Guangzhou 510642, China

\* Correspondence: shchen@scau.edu.cn; Tel+86-20-85288229

† These authors contributed equally to this work.

**Table S1.** Isolation and screening of DSF-degrading strains.

| Strains | DSF degradation (%) |
|---------|---------------------|
| HN-1    | 81.0 ± 0.9          |
| HN-2    | 100 ± 0.2           |
| HN-3    | 79.9 ± 0.6          |
| HN-4    | 69.0 ± 1.0          |

Note: Means are averaged values of three replicates.

**Table S2.** The BLAST results of different *Cupriavidus* strains were detected at >99% similarity.

| <i>Cupriavidus</i> sp.                                      | Query<br>Cover | E<br>value | Similarit<br>y | Accession   |
|-------------------------------------------------------------|----------------|------------|----------------|-------------|
| <i>Cupriavidus</i> sp. strain HN-2                          | 100%           | 0          | 100.00%        | MG561941.1  |
| <i>Cupriavidus</i> sp. PND-6                                | 99%            | 0          | 99.86%         | EF687003.1  |
| <i>Cupriavidus</i> sp. TFD45                                | 99%            | 0          | 100.00%        | EU827492.1  |
| <i>Cupriavidus</i> sp. SM-2017                              | 99%            | 0          | 99.71%         | LC218379.1  |
| <i>Cupriavidus pinatubonensis</i> strain: 1266              | 99%            | 0          | 99.50%         | AB121227.1  |
| <i>Cupriavidus pinatubonensis</i> strain: 1243              | 99%            | 0          | 99.50%         | AB121220.1  |
| <i>Cupriavidus pinatubonensis</i> strain: 1247              | 99%            | 0          | 99.43%         | AB121223.1  |
| <i>Cupriavidus pinatubonensis</i> strain 1245               | 99%            | 0          | 99.43%         | NR_040987.1 |
| <i>Cupriavidus pinatubonensis</i> strain: 1249              | 99%            | 0          | 99.36%         | AB055427.2  |
| <i>Cupriavidus</i> sp. PIC4                                 | 99%            | 0          | 99.50%         | KF954774.1  |
| <i>Cupriavidus pinatubonensis</i> type strain<br>CCUG53907T | 98%            | 0          | 99.64%         | FN597611.1  |

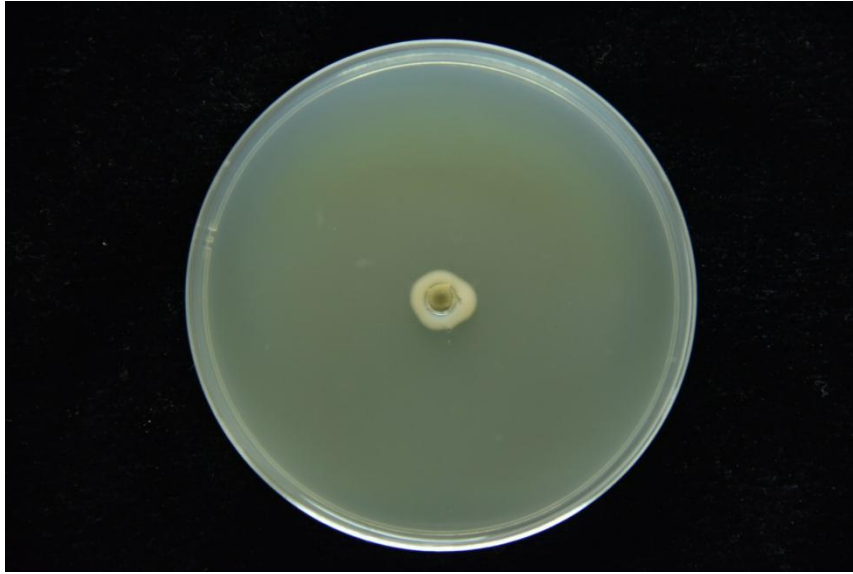

**Figure S1.** The isolate HN-2 did not show antagonism against *Xcc*. Holes punched in the LB plate contained culture solution of *Xcc* and isolate HN-2.

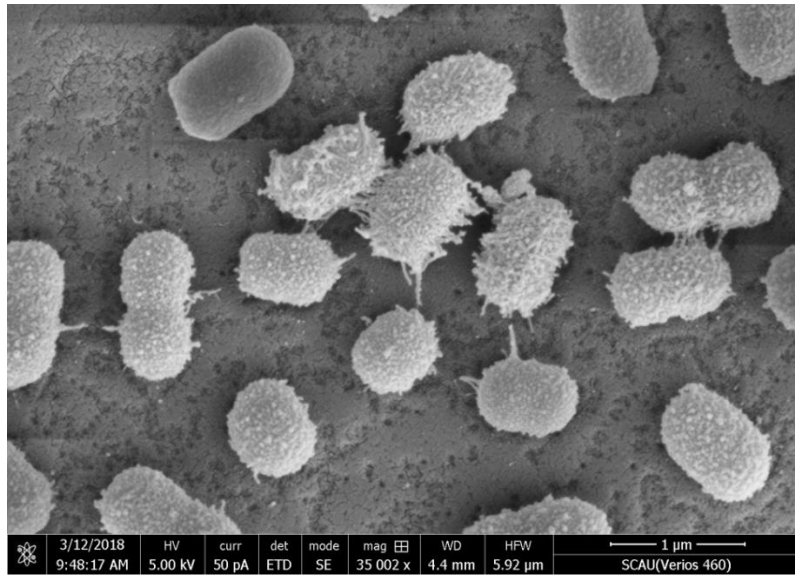

**Figure S2.** The scanning electron microscope image of strain HN-2. The strain HN-2 cell was ellipse to rod-shaped ( $0.4\text{--}0.8 \times 0.6\text{--}1.2 \mu\text{m}$ ), straight, and without flagella.

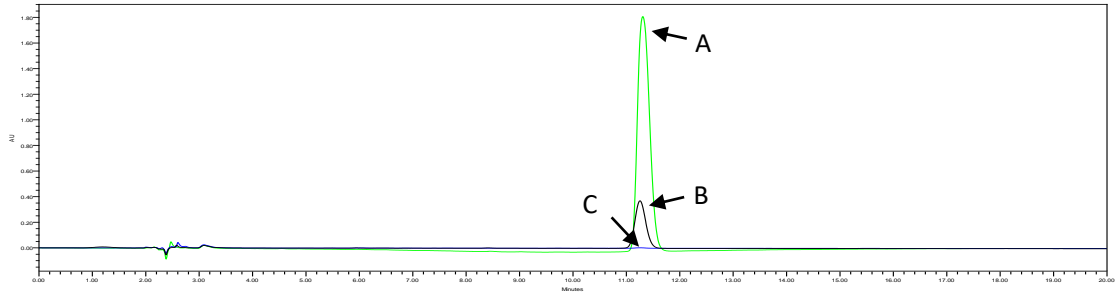

**Figure S3.** The remaining amount of DSF at different time points determined by HPLC. A, B, C represent the amount of remaining DSF with the strain HN-2 at 0 h, 12 h, and 24 h.

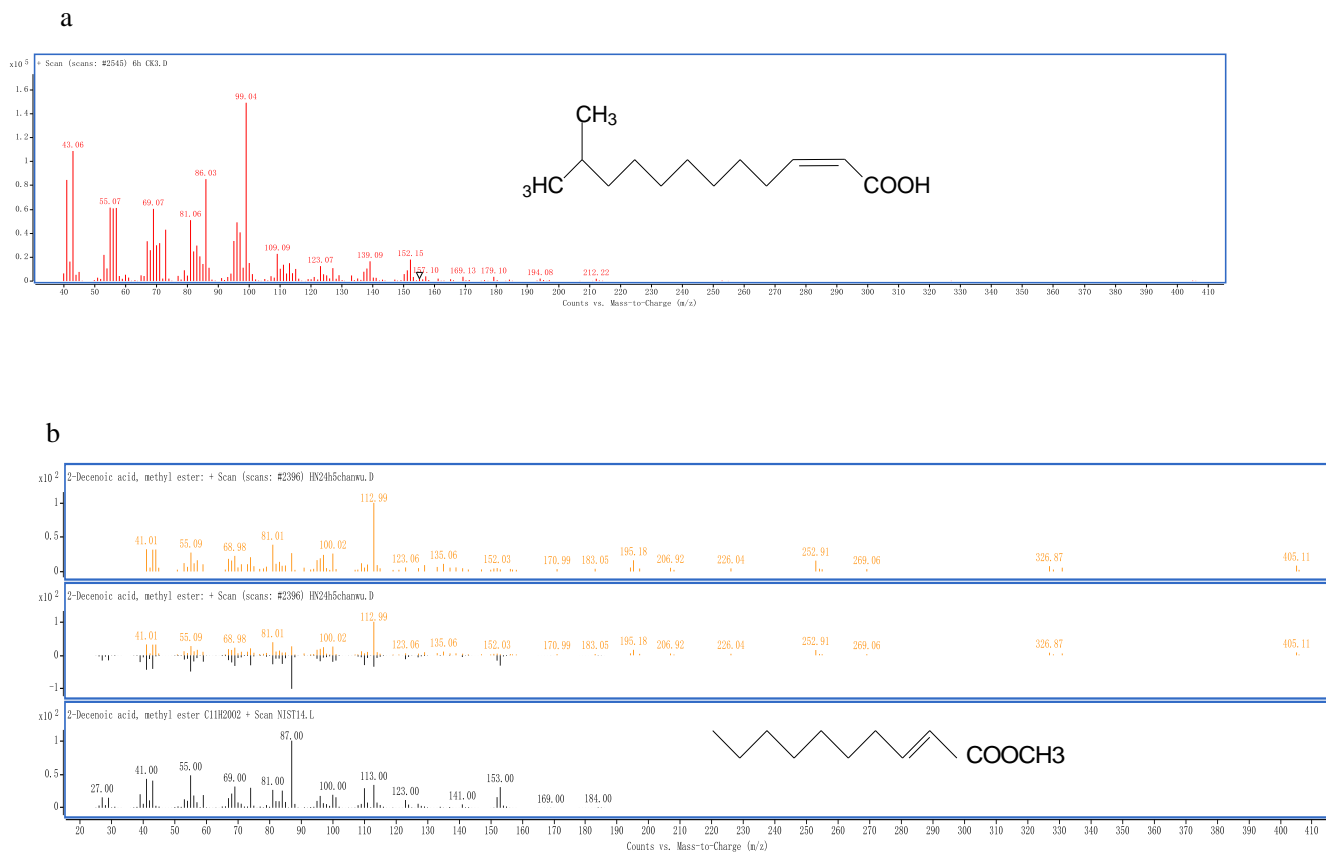

**Figure S4.** Mass spectra and proposed structures of detected degradation products identified with GC-MS. (a) DSF; (b) *trans*-2-decenoic acid methyl ester.
